# Supplementary material for: The Systems Biology Research Tool: evolvable open-source software
Source: PubMed Central journal article supplement (PMC2446383; doi:10.1186/1752-0509-2-55), 2008-06-29
Supplement: 1752-0509-2-55-S2.pdf [file 1752-0509-2-55-S2.pdf]

**Descriptions of the 51 processes currently implemented in the Systems Biology Research Tool.**

| Category          | Process Name                                                     | Brief Description                                                                                                          |
|-------------------|------------------------------------------------------------------|----------------------------------------------------------------------------------------------------------------------------|
| Flux Optimization | FBA Optimization                                                 | Used to compute the optimal value of a flux or linear combination of fluxes in a stoichiometric network.                   |
|                   | Reaction Deletion                                                | Used to compute the effect of deleting sets of reactions in a stoichiometric network.                                      |
|                   | Catalyst Deletion                                                | Used to compute the effect of deleting sets of catalysts in a stoichiometric network.                                      |
|                   | Objective Function Analysis                                      | Used to compute the optimal values of multiple objective functions for a stoichiometric network.                           |
|                   | Constraint Variation                                             | Used to compute the optimal values of a single objective function for multiple sets of flux constraints.                   |
|                   | Constraint Variation-Reaction Deletion                           | Used to compute the combined effects of deleting reactions and varying the flux constraints in a stoichiometric network.   |
|                   | Constraint Variation-Catalyst Deletion                           | Used to compute the combined effects of deleting catalysts and varying the flux constraints in a stoichiometric network.   |
|                   | Constraint Variation-Objective Function Analysis                 | Used to compute the optimal values of multiple objective functions for multiple sets of flux constraints.                  |
| Flux Variability  | Simple Flux Intervals                                            | Used to compute the intervals of fluxes in a stoichiometric network in the simplest possible way.                          |
|                   | Constrained Reverse Reaction Flux Intervals                      | Used to compute the intervals of fluxes in a stoichiometric network after constraining the fluxes of reversible reactions. |
|                   | Flux Cap Identification                                          | Used to create <i>caps</i> for each unbounded flux in a stoichiometric network.                                            |
|                   | Mahadevan-Schilling Flux Intervals                               | Used to compute the Mahadevan-Schilling flux intervals in a stoichiometric network.                                        |
|                   | Constraint Variation-Simple Flux Intervals                       | Used to compute the <i>simple</i> flux intervals for multiple sets of flux constraints.                                    |
|                   | Constraint Variation-Constrained Reverse Reaction Flux Intervals | Used to compute <i>constrained reverse reaction</i> flux intervals for multiple sets of flux constraints.                  |
|                   | Constraint Variation-Mahadevan-Schilling Flux Intervals          | Used to compute Mahadevan-Schilling flux intervals for multiple sets of flux constraints.                                  |

|                                          |                                                           |                                                                                                                                                        |
|------------------------------------------|-----------------------------------------------------------|--------------------------------------------------------------------------------------------------------------------------------------------------------|
| Chemical Reaction Pathway Identification | Extreme Current Identification                            | Used to identify the extreme currents in stoichiometric networks.                                                                                      |
|                                          | WW Network Reduction                                      | Used to reduce the size of stoichiometric networks for the purpose of identifying the cycles they contain.                                             |
|                                          | MS Network Reduction                                      | Used to reduce the size of stoichiometric networks for the purpose of identifying the cycles they contain.                                             |
|                                          | SLP Cycle Identification                                  | Used to identify the cycles in stoichiometric networks.                                                                                                |
| Flux Space Sampling                      | Random Constraint Generator                               | Used to generate random flux constraints.                                                                                                              |
|                                          | Random Objective Function Generator                       | Used to generate random objective functions.                                                                                                           |
|                                          | Initial Point Generator                                   | Used to compute an initial flux vector for use in CD Hit-and-Run Analysis.                                                                             |
|                                          | Coordinate Direction Hit-and-Run Analysis                 | Used to compute random, uniformly-distributed flux vectors from the interior flux space.                                                               |
|                                          | Space Variation-Initial Point Generator                   | Used to compute initial flux vectors for use in Space Variation-CD Hit-and-Run Analysis.                                                               |
|                                          | Space Variation-Coordinate Direction Hit-and-Run Analysis | Used to compute random, uniformly-distributed flux vectors from the interiors of multiple flux spaces.                                                 |
| Flux Data Analysis                       | Flux Activity Analysis                                    | Used to analyze the activity of fluxes in a collection of flux vectors.                                                                                |
|                                          | Flux Plasticity Analysis                                  | Used to analyze the plasticity of fluxes in a collection of flux interval vectors.                                                                     |
| Stoichiometric Network Utilities         | Simple Reaction File Reader                               | Used to translate files containing a list of chemical reactions into human-readable <i>FBA Reaction Files</i> .                                        |
|                                          | Palsson-SBML File Reader                                  | Used to read SBML files from Dr. Palsson's website.                                                                                                    |
|                                          | BiGG-SBML File Reader                                     | Used to read SBML files from the BiGG Database.                                                                                                        |
|                                          | Palsson-SBML File Translation                             | Used to translate SBML files from Dr. Palsson's website into human-readable <i>FBA Reaction Files</i> and <i>Reaction-Catalyst Association Files</i> . |
|                                          | BiGG-SBML File Translation                                | Used to translate SBML files from the BiGG Database into human-readable <i>FBA Reaction Files</i> and <i>Reaction-Catalyst Association Files</i> .     |
|                                          | Metatool File Writer                                      | Used to convert <i>FBA Reaction Files</i> into input files for Metatool.                                                                               |
|                                          | Network Information Gatherer                              | Used to gather basic information about a stoichiometric network.                                                                                       |
|                                          | FBA System Solver                                         | Used to solve the equation $Sv = 0$ .                                                                                                                  |

|                          |                                          |                                                                                   |
|--------------------------|------------------------------------------|-----------------------------------------------------------------------------------|
| <b>Graph Theory</b>      | Path Identification in a Directed Graph  | Used to identify the simple paths in a directed graph.                            |
|                          | Cycle Identification in a Directed Graph | Used to identify the simple cycles in a directed graph.                           |
| <b>Geometry</b>          | Coordinate Directions Hit-and-Run        | Used to generate random interior points within convex polytopes.                  |
| <b>Algebra</b>           | Linear System Solver                     | Used to solve systems of linear equations using Mathematica.                      |
|                          | Multiple-Vectors File Conversion         | Used to convert a single multiple-vectors file into multiple single-vector files. |
|                          | Single-Vector Files Conversion           | Used to convert multiple single-vector files into a single multiple-vectors file. |
|                          | Matrix File Conversion                   | Used to convert a matrix into a list of linear combinations.                      |
|                          | Linear Combination File Combination      | Used to convert a list of linear combinations into a matrix.                      |
| <b>Combinatorics</b>     | Single-Element Unions                    | Used to compute single-element unions of collections of sets.                     |
|                          | Strict Single-Element Unions             | Used to compute strict single-element unions of collections of sets.              |
| <b>Statistics</b>        | Correlation Estimation                   | Used to compute a variety of correlation coefficients using $R$ .                 |
|                          | Kendall's Tau Correlation                | Used to compute Kendall's tau correlation statistics.                             |
|                          | Mann-Whitney U Test                      | Used to compute Mann-Whitney U statistics.                                        |
| <b>General Utilities</b> | Interval Comparison                      | Used to compare intervals for equality within a given tolerance.                  |
|                          | Numerical Vector Comparison              | Used to compare numerical vectors for equality within a given tolerance.          |
|                          | Variable Participation                   | Used to group mathematical expressions based on the variables they contain.       |
